1 **Differences in directed functional brain connectivity related to age and sex**

2  
3 Martina J. Lund<sup>1\*</sup>, Dag Alnæs<sup>1</sup>, Simon Schwab<sup>2,3</sup>, Dennis van der Meer<sup>1,4</sup>, Ole A.  
4 Andreassen<sup>1</sup>, Lars T. Westlye<sup>1,5</sup>, Tobias Kaufmann<sup>1\*</sup>.

5  
6 <sup>1</sup> Norwegian Centre for Mental Disorders Research (NORMENT), Division of Mental Health  
7 and Addiction, Oslo University Hospital, and Institute of Clinical Medicine, University of  
8 Oslo, Norway

9 <sup>2</sup> Center for Reproducible Science & Department of Biostatistics, University of  
10 Zürich, Switzerland

11 <sup>3</sup> Big Data Institute, Li Ka Shing Centre for Health Information and Discovery, Nuffield  
12 Department of Population Health, University of Oxford, Oxford, UK

13 <sup>4</sup> School of Mental Health and Neuroscience, Faculty of Health, Medicine and Life Sciences,  
14 Maastricht University, Maastricht, The Netherlands

15 <sup>5</sup> Department of Psychology, University of Oslo, Norway.

16  
17 \* Corresponding authors:

18 Martina J. Lund and Tobias Kaufmann, PhD

19 Email: [m.j.lund@medisin.uio.no](mailto:m.j.lund@medisin.uio.no), [tobias.kaufmann@medisin.uio.no](mailto:tobias.kaufmann@medisin.uio.no)

20 Postal address: OUS, PoBox 4956 Nydalen, 0424 Oslo, Norway

21 Telephone: +47 23 02 73 50, Fax: +47 23 02 73 33

22  
23 Counts:

24 Abstract: 261 words

25 Main text body: 5240 words

26 Figures: 6

27  
28 Keywords:

29 Directed functional brain connectivity

30 Cognitive aging

31 Dynamic graphical models

32 Resting-state fMRI

33 UK Biobank

34 HCP

35

36

37 **Abstract**

38 Objective: Functional interconnections between brain regions define the ‘connectome’ which  
39 is of central interest for understanding human brain function, and is increasingly recognized in  
40 the pathophysiology of mental disorders. Previous resting-state functional magnetic resonance  
41 (rsfMRI) work has revealed changes in static connectivity related to age, sex, cognitive  
42 abilities and psychiatric symptoms, yet little is known how these factors may alter the  
43 information flow. The commonly used approach infers functional brain connectivity using  
44 stationary coefficients yielding static estimates of the undirected connection strength between  
45 two brain regions. Dynamic graphical models (DGMs) are a multivariate model with dynamic  
46 coefficients reflecting directed temporal associations between network nodes, and can yield  
47 novel insight into directed functional brain connectivity. Here, we aimed to validate the DGM  
48 method and determine information flow across the brain connectome and its relationship to  
49 age, sex, intellectual abilities and mental health.

50 Methods: We applied DGM to investigate patterns of information flow in data from 984  
51 individuals from the Human Connectome Project (HCP) and 10,249 individuals from the UK  
52 Biobank.

53 Results: Our analysis replicated previously reported patterns of directed connectivity in  
54 independent HCP and UK Biobank data, including that the cerebellum consistently receives  
55 information from other networks. We show robust associations between information flow and  
56 both age and sex for several connections, with strongest effects of age observed in the  
57 sensorimotor network. No significant effects were found for intellectual abilities or mental  
58 health.

59 Discussion: Our findings support the use of DGM as a measure of directed connectivity in  
60 rsfMRI data and provide new insight into the shaping of the connectome during aging.

61



63 **Introduction**

64 Although the rates and trajectories vary substantially between individuals and cognitive  
65 domains (Ardila, 2007), normal aging is primarily associated with a decline in most cognitive  
66 functions, including executive functions, attention, memory and perception (Riddle, 2007).  
67 Numerous studies have established pronounced age-related differences in brain network  
68 connections (Betzel et al., 2014; Cassady et al., 2019; Dørum et al., 2017; Geerligs, Renken,  
69 Saliassi, Maurits, & Lorist, 2015; Grady, Springer, Hongwanishkul, McIntosh, & Winocur,  
70 2006; Maglanoc, Kaufmann, van der Meer, et al., 2019; Meunier, Achard, Morcom, &  
71 Bullmore, 2009; Wang, Su, Shen, & Hu, 2012). However, so far mostly age-related network  
72 changes have been studied using static functional connectivity, where connectivity strengths  
73 are estimated from stationary coefficients and assumed not to change short-term during the  
74 period of scan. Dynamic functional connectivity (i.e., time-varying connectivity) has been  
75 studied to a lesser degree yet could yield new knowledge about connectivity direction, thereby  
76 supplementing approaches for static connectivity with insight into the information flow of  
77 neural activity, underlying processes related to cognitive functions and mental health  
78 (Hutchison et al., 2013).

79         There are various approaches to estimate connectivity direction, often divided into  
80 *effective connectivity* and *directed functional connectivity* (K. Friston, Moran, & Seth, 2013).  
81 Effective connectivity refers to the causal influence that one node exerts over another  
82 (Bielczyk et al., 2019; K. J. Friston, 2011), while directed functional connectivity (dFC)  
83 denotes information flow between nodes by estimating statistical interdependence using  
84 measured blood-oxygen-level-dependent (BOLD) responses (Bielczyk et al., 2019). Recent  
85 work has provided evidence of changes in connectivity direction with age. For instance, one  
86 study noted posture-related changes in effective connectivity with elderly compared to  
87 younger participants showing higher effective connectivity between the prefrontal cortex

88 (PFC) and the motor cortex (MC) as measured using functional near-infrared spectroscopy  
89 (fNIRS) while standing (Huo et al., 2018). Studies have also reported age-related  
90 psychomotor slowing with higher effective connectivity (Michely et al., 2018), in addition to  
91 changes in effective connectivity in certain areas of the brain of elderly APOE  $\epsilon$ 4 carriers  
92 (Luo et al., 2019). It has also been shown that there are alterations in effective connectivity in  
93 the prefrontal cortex during emotion processing in individuals with autism spectrum disorders  
94 (Wicker et al., 2008), and disrupted effective connectivity in patients with externalizing  
95 behavior disorders (Shannon, Sauder, Beauchaine, & Gatzke-Kopp, 2009), schizophrenia  
96 (Schlösser et al., 2003) and depression (Lu et al., 2012; Rolls et al., 2018). Others have  
97 investigated effective connectivity in relation to psychedelics and found evidence for  
98 alterations in cortico-striato-thalamic-cortico loops in individuals given LSD (Preller et al.,  
99 2019). Changes in effective connectivity have also been observed in relation to episodic  
100 simulation and social cognition (Pehrs, Zaki, Taruffi, Kuchinke, & Koelsch, 2018), as well as  
101 memory function in a neurodevelopmental sample (Riley et al., 2018). However, how the  
102 information flow between nodes in the functional brain connectome is associated as a whole  
103 with age, sex, cognition and mental health has yet to be delineated.

104         Dynamic graphical models (DGM) is a form of Dynamic Bayesian Networks, which  
105 describes the instantaneous directed relationships between nodes (Bilmes, 2010; Schwab et  
106 al., 2018). From this, one can study the spatiotemporal arrangement of links in the network,  
107 defined here as the directionality between a node pair. This statistical method can give a  
108 meaningful characterization of the dynamic connectivity between network nodes. Initial  
109 implementation and validation of the approach in resting-state functional magnetic resonance  
110 (rsfMRI) data from mice (N=16) and humans (N=500) (Schwab et al., 2018) suggested  
111 consistent default mode network (DMN) influence on cerebellar, limbic and  
112 auditory/temporal networks, in addition to a stable mutual relationship between visual medial

113 (VM) and visual lateral (VL) networks in human rsfMRI. Here, we aimed to replicate these  
114 findings using independent data from the Human Connectome Project (HCP, (Van Essen et  
115 al., 2013)) and the UK Biobank (Sudlow et al., 2015). In addition, we extended the analysis to  
116 examine if there were associations between dFC and age, age<sup>2</sup>, sex, intellectual abilities and  
117 mental health measures. We tested these associations for every connection of the directed  
118 network (edge-level analysis), and on node-level by assessing associations with network  
119 balance (the number of output connections divided by the number of input connections, for a  
120 given node).

121

## 122 **Methods**

### 123 **Study samples**

124 HCP: The HCP consortium is funded by the National Institutes of Health (NIH) led by  
125 Washington University, University of Minnesota, and Oxford University. HCP is undertaking  
126 a systematic effort to map macroscopic human brain circuits and their relationship to behavior  
127 in a large population of young healthy adults (Van Essen et al., 2013). HCP participants are  
128 drawn from a healthy population born in Missouri, in the age range of 22–35 years, where a  
129 proportion of the subjects included are adult twins and their non-twin siblings (Van Essen et  
130 al., 2013). The adult sample consists of 1200 subjects. Exclusion criteria include having  
131 siblings with severe neurodevelopmental disorders, documented neuropsychiatric or  
132 neurologic disorders. Furthermore, individuals with illnesses such as diabetes or high blood  
133 pressure and twins born prior to 34 weeks' gestation and non-twins born prior to 37 weeks'  
134 gestation were excluded (Van Essen et al., 2013). The participants went through an MRI  
135 protocol, in addition to extensive behavioral assessment outside the scanner, in the domains of  
136 cognitive, emotional, motor, and sensory functions (Van Essen et al., 2013). All participants

137 provided signed informed consent. Washington University Institutional Review Board  
138 approved the study (Glasser et al., 2016).

139 UK Biobank: The UK Biobank initiative is a large-scale biobank prospective cohort  
140 established by the Medical Research Council and Wellcome Trust (Collins, 2012), and funded  
141 by the UK Medical Research Council, Wellcome Trust, Department of Health, British Heart  
142 Foundation, Diabetes UK, Northwest Regional Development Agency, Scottish Government,  
143 and Welsh Assembly Government (Sudlow et al., 2015). This population-based study  
144 examines the influence of genetic and environmental factors and the occurrence of disease in  
145 participants included in the age range of 40-69 years old, recruited from 2006-2010 and  
146 assessed at 22 centers throughout the UK (Sudlow et al., 2015). The study has recruited  
147 500 000 subjects, where 100 000 are going to be included as an MRI subgroup (Miller et al.,  
148 2016). Further, participants filled out questionnaires about lifestyle, family, as well as medical  
149 history in addition to completing a variety of physical measures (Sudlow et al., 2015). In  
150 addition, a subset of participants filled in a mental health questionnaire (MHQ) online. All  
151 participants provided signed informed consent. UK Biobank was approved by the National  
152 Health Service National Research Ethics Service (ref 11/NW/0382, (Health Research  
153 Authority, 2016)).

154

### 155 MRI acquisition

156 MR data was collected by the study teams of HCP and UK Biobank.

157 HCP: MRI data from the HCP study was collected using a customized 3T Siemens  
158 Skyra with a 32-channel receive head coil at Washington University, US. Resting- state  
159 blood-oxygen-level-dependent (BOLD) fMRI data was collected for each subject using a  
160 T2\*-weighted BOLD echo-planar imaging (EPI) sequence with the following parameters:  
161 TR/TE/FA = 720ms/33.1ms/52°; voxel size, 2.0×2.0×2.0 mm, MB=8, BW = 2290 Hz/Px, in-

162 plane FOV = 208 × 180 mm, fat sat, 1200 volumes; scan time ≈ 15min per rsfMRI session (in  
163 total 4 rsfMRI sessions = 4800 volumes)(Smith et al., 2013). A T1-weighted 3D MPRAGE,  
164 sagittal sequence with the following pulse sequence parameters was obtained: repetition time  
165 (TR)/echo time (TE)/flip angle (FA) = 2.4ms/2.14ms/8°; voxel size = 0.7 × 0.7 × 0.7 mm,  
166 FOV: 88×224×224, iPAT=2, scan time = 7min 40 sec. The T1-weighted image was used for  
167 registration to the EPI data in the present study. rsfMRI data were collected over 2 days  
168 divided into 4 rsfMRI sessions where the scanning session took 1 hour each of the days,  
169 including task fMRI (Glasser et al., 2016).

170 UK Biobank: MR data from the UK Biobank study was collected with a 3T standard  
171 Siemens Skyra using a 32-channel receive head coil at Newcastle and Cheadle Imaging  
172 Centre in the UK. Resting- state blood-oxygen-level-dependent (BOLD) fMRI data was  
173 collected for each subject using a T2\*-weighted BOLD echo-planar imaging (EPI) sequence  
174 with the following parameters: TR/TE/FA = 735ms/39ms/52°; voxel size, 2.4×2.4×2.4 mm,  
175 MB=8, R=1, no iPAT, fat sat, 490 volumes; scan time = 6min 10 sec. A T1-weighted 3D  
176 MPRAGE, sagittal sequence with the following pulse sequence parameters was obtained:  
177 repetition time (TR)/echo time (TE)/flip angle (FA) = 2.0ms/2.01ms/8°; voxel size = 1.0 × 1.0  
178 × 1.0 mm, FOV: 208×256×256, in-plane acceleration iPAT=2, scan time = 5 min. The T1-  
179 weighted image was used for registration to the EPI data in the present study. The entire MRI  
180 protocol took 31 minutes in effective scan time (Miller et al., 2016).

181

## 182 MRI preprocessing

183 HCP: Processed HCP data was obtained from the HCP database  
184 (<https://ida.loni.usc.edu/login.jsp>), where we downloaded the released PTN 1200-subjects  
185 package. The HCP project processed the data through their pipeline, which is specifically  
186 made for HCP high-quality data (Glasser et al., 2013). Their preprocessing comprised image



187 processing tools, based on Smith et al. (2013), with minimal-preprocessing according to  
188 Glasser et al. (2013). In addition, areal-feature-based alignment and the multimodal surface  
189 matching algorithm was applied for inter-subject registration of the cerebral cortex (Glasser et  
190 al., 2013; Robinson et al., 2014). Further, artefacts were removed by means of FIX (FMRIB's  
191 ICA-based X-noisiefier, (Griffanti et al., 2014; Salimi-Khorshidi et al., 2014)), and ICA  
192 (independent component analysis, (Beckmann & Smith, 2004)) while dual regression was  
193 used for further processing of timeseries, these steps are described in more detail below. HCP  
194 structural data was manually quality checked while the fMRI data went through a built in  
195 quality control pipeline where estimates including voxel-wise temporal standard deviation  
196 (tSD), temporal SNR (tSNR), movement rotation and translation were computed (Marcus et  
197 al., 2013). In addition, the BIRN Human QA tool was used (Glover et al., 2012; Marcus et al.,  
198 2013). 184 subjects were reconstructed using an earlier version of the HCP data  
199 reconstruction software, while 812 subjects were run through a later edition, and 7 subjects  
200 was processed using a mixture of the two methods. Further, the data was temporally  
201 demeaned and variance normalized (Beckmann & Smith, 2004). Next, fMRI datasets were  
202 submitted to a group ICA, a data driven analysis technique used to discover independently  
203 distributed spatial patterns that represent source processes in the data (Beckmann & Smith,  
204 2004). ICA extracts spatially independent components, a set of spatial maps and associated  
205 time courses, by use of blind signal source separation and linear decomposition of fMRI data  
206 (McKeown et al., 1998; McKeown & Sejnowski, 1998). MIGP (MELODIC's Incremental  
207 Group-PCA) from 468 subjects were used to generate group-PCA that was used for the  
208 group-ICA utilizing FSL's Multivariate Exploratory Linear Optimized Decomposition into  
209 Independent Components (MELODIC) tool (Beckmann & Smith, 2004; Hyvärinen, 1999),  
210 where 25 components were extracted and used for further processing. ICA was applied in  
211 grayordinate space (Glasser et al., 2013). Dual regression was applied to estimate specific

212 spatial maps and corresponding time series from the group ICA for each subject (Beckmann  
213 & Smith, 2004; Filippini et al., 2009). As Schwab et al. (2018) showed consistency in dFC  
214 between rsfMRI sessions, we included data from all 4 rsfMRI sessions in our analysis and as  
215 such dual regression was applied on the subjects that had completed all four rsfMRI sessions.

216 UK Biobank: Processed data was accessed from the UK Biobank study team under  
217 accession code 27412. The Biobank preprocessing comprised image processing tools, largely  
218 acquired from FSL (<http://fsl.fmrib.ox.ac.uk>), and complied with the pre-processing steps  
219 done as part of the HCP pipeline, including motion correction using MCFLIRT, grand-mean  
220 intensity normalisation of the 4D dataset by a single multiplicative factor, high pass temporal  
221 filtering and distortion correction (Alfaro-Almagro et al., 2018). The EPI unwarping step  
222 included alignment to the T1, where the unwrapped data is written out in native fMRI space,  
223 while the transform to T1 space is written out independently (Alfaro-Almagro et al., 2018).  
224 FMRIB's Linear Image Registration tool (FLIRT) was used to register fMRI volumes to the  
225 T1-weighted image (Mark Jenkinson, Bannister, Brady, & Smith, 2002; M. Jenkinson &  
226 Smith, 2001). Boundary based registration (Greve & Fischl, 2009) was used in a final step to  
227 refine the registration of the EPI and structural image. The ICA+FIX and dual regression  
228 procedure corresponds to what we reported for HCP above. For the UK Biobank sample,  
229 4100 fMRI datasets were submitted to a group ICA, where 25 components were extracted  
230 from the ICA and used for further analysis. A FIX classifier for UK Biobank imaging data  
231 was hand trained on 40 Biobank rsfMRI datasets for removal of artefacts (Alfaro-Almagro et  
232 al., 2018). As for quality assessment, part of the UK Biobank imaging pipeline entails  
233 assessment of the T1-weighted images, which includes automated classification by use of  
234 machine learning (Alfaro-Almagro et al., 2018). If a T1-weighted image has been classified as  
235 having serious issues, the dataset has not been used in this study.

236

237 Included participant data

238 HCP: From the HCP data release, four subjects were excluded due to missing information  
239 about mean relative motion and 15 individuals were excluded due to missing information in  
240 cognitive or mental health data, yielding data from a total of 984 individuals aged 22-37 years  
241 (mean: 28.7 years, sd: 3.71 years, 52.8% females) for the analysis on all HCP subjects. Out of  
242 those, data from 495 individuals were not included by Schwab et al. (2018) and were included  
243 for an additional replication analysis (mean: 28.6 years, sd: 3.72 years, 49.5% females).

244 UK Biobank: From the UK Biobank data release, we started out with 16,975 subjects, where  
245 we excluded subjects with a diagnosed neurological or psychiatric disorder (N=1,319) as well  
246 as 5,082 subjects missing information on mean relative motion, cognitive and mental health  
247 data, and 325 subjects that had a different number of volumes than in the standard protocol,  
248 yielding data from a total of 10,249 individuals aged 40-70 years (mean: 55.4 years, sd: 7.37  
249 years, 53.8% females).

250

251 Network analysis

252 For both HCP and UKB sample, we accessed the time series of decompositions performed  
253 with 25 independent components. In each sample, we chose ten resting-state networks (RSNs)  
254 that had the highest spatial correlation with the ten RSNs reported by Smith et al. (2009), and  
255 in line with the procedure used in Schwab et al. (2018). These RSNs comprised default mode  
256 (DMN), cerebellar (Cer), visual occipital (VO), visual medial (VM), visual lateral (VL), right  
257 frontoparietal (FPR), left frontoparietal (FPL), sensorimotor (SM), auditory (Au), and  
258 executive control (Ex) networks. The timeseries for the ten RSNs were mean centered so that  
259 each timeseries for each node had a mean of zero. Finally, utilizing the DGM package v1.7.2  
260 in R we estimated dFC from individual level RSN time series. RSNs will henceforth be  
261 referred to as network “nodes” as we estimated temporal connectivity between RSNs.

262

263 Statistical analysis

264 For both HCP and UK Biobank data, we performed logistic regressions for every connection  
265 of the directed network using directed connectivity as the response variable and testing for  
266 associations with age, age<sup>2</sup>, sex, intellectual abilities, mental health, motion and scanner site.  
267 We refer to this as edge-level analysis. Furthermore, we assessed input and output  
268 connections for a given network together, to examine the balance between a network's sent  
269 and received information. As such we calculated the ratio between the number of output  
270 connections and the number of input connections for a given node, and we refer to this as  
271 node-level analysis. To avoid inducing missing values when the denominator is 0, we added  
272 0.5 to the dominator and nominator of dFC before taking the ratio (Sankey, Weissfeld, Fine,  
273 & Kapoor, 1996). We performed linear regression using this balance as a dependent variable  
274 and the same independent variables as used on the edge-level. All p-values were Bonferroni  
275 corrected for a number of 90 analyses on the edge-level and for 10 analysis on the node-level.

276 For the HCP data, we used the age-adjusted NIH Toolbox Cognition Total Composite  
277 Score as a measure of cognitive abilities, and the gender and age adjusted T-score of the  
278 Achenbach Adult Self-Report, Syndrome Scales and DSM-Oriented Scale (ASR) as a  
279 measure of mental health for the HCP participants. In addition, we calculated the mean of the  
280 relative motion across the 4 rsfMRI runs to get a sum score of motion and the statistical  
281 models tested in HCP thus included age, age<sup>2</sup>, sex, COG, ASR and motion where age is  
282 defined as poly(age,2).

283 For UK Biobank, we used the Fluid Intelligence score (UKB field: 20016, which  
284 consisted of the sum of the number of correct answers given to 13 fluid intelligence items)  
285 where we controlled for age on Fluid Intelligence before using the residuals in the analysis as  
286 a measure of cognitive abilities for participants in the UK Biobank sample. Further, we

287 inferred mental health by performing a principal component analysis (PCA) on 14 items of  
288 the online MHQ available for 154,607 participants with less than 3 missing values on the  
289 included items (Figure 1). We imputed missing values in R using the missMDA package  
290 (Josse & Husson, 2016) and subsequently performed the PCA using the “prcomp” function.  
291 The first PC, often referred to as the p-Factor or pF (Caspi et al., 2013), explained 27.02% of  
292 the variance. This component related mostly to depression/anxiety items. Given recent  
293 indications that psychopathology may not be explained by a single dimension (Mallard et al.,  
294 2019), we also included the second principal component, which explained 11.94% of the  
295 variance. We refer to this component as pF<sub>2</sub>, and this component related mostly to psychosis  
296 items. The statistical models tested in UK Biobank thus included age, age<sup>2</sup>, sex, fluid  
297 intelligence, pF, pF<sub>2</sub>, motion and scanning site where age is defined as poly(age,2).

298

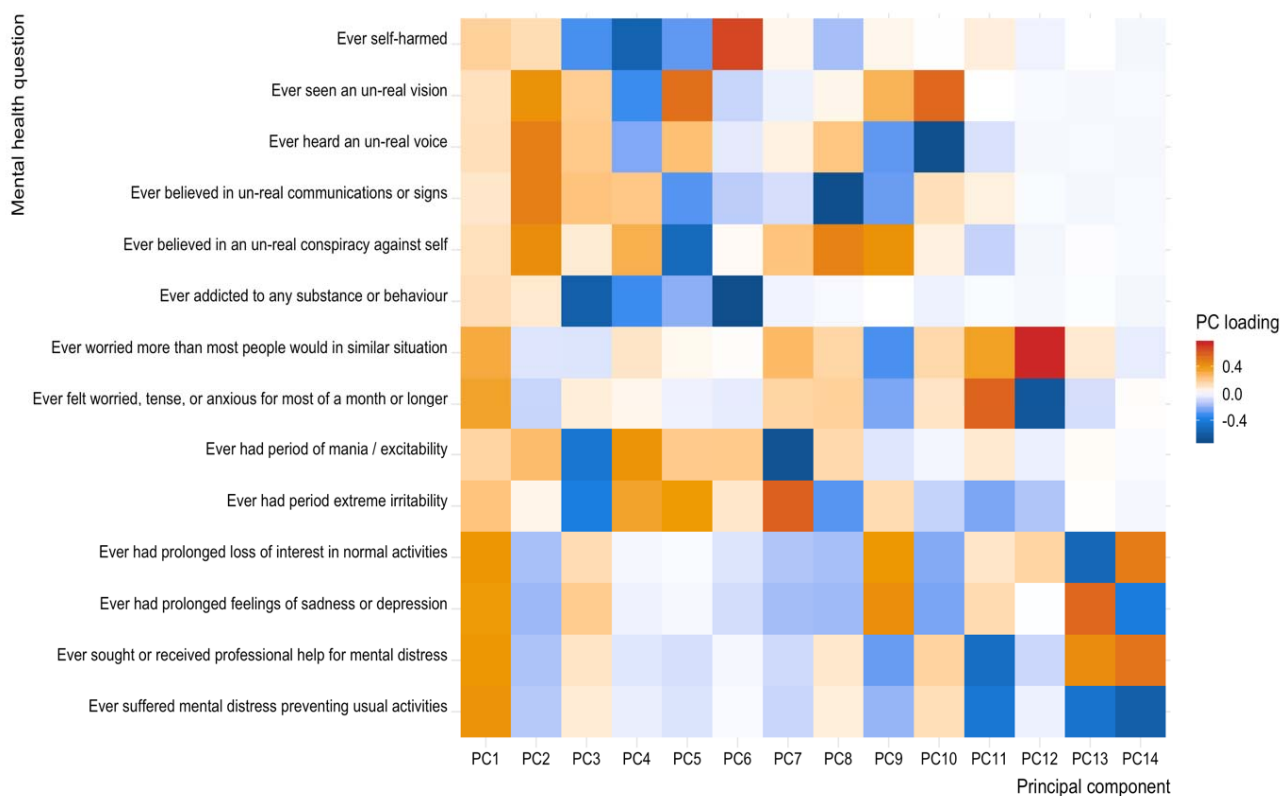

299

300 *Figure 1: Principal component analysis (PCA) of mental health questionnaire from UK*  
301 *Biobank. We used the first two principal components as proxies of general psychopathology,*  
302 *referred to as “pF” and “pF<sub>2</sub>”.*

303

## 304 **Results**

305 We uncovered the same pattern of dFC between networks as previously reported (Fig 2a,  
306 Schwab et al., 2018), when using only data from independent subjects that were not used in  
307 Schwab et al. (2018) (Fig 2b) and likewise when using all available HCP data (Fig 2c). The  
308 cerebellar and auditory network appeared to be mostly a receiver in terms of directional  
309 information flow in the network.

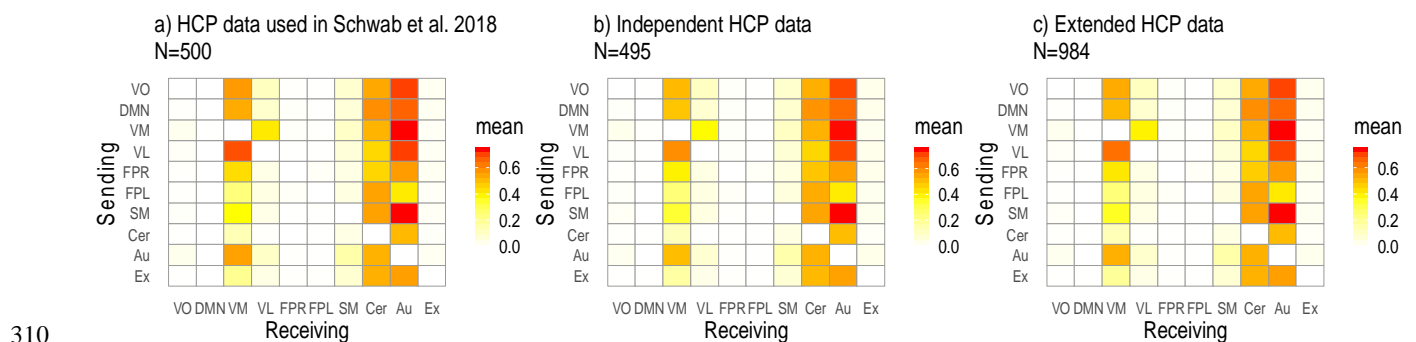

310

311 *Figure 2: Average directed connectivity matrices across subjects for HCP data showing the*  
312 *proportions of edges in a) data previously reported by Schwab et al 2018, b) independent*  
313 *data, c) all available data (a+b; slight differences in sample size due to differences in*  
314 *exclusion criteria). The legend shows the 10 RSNs included in the analysis, where the y-axis*  
315 *indicates the sender node, while the x-axis refers to the same nodes but here they are*  
316 *receivers.*

317

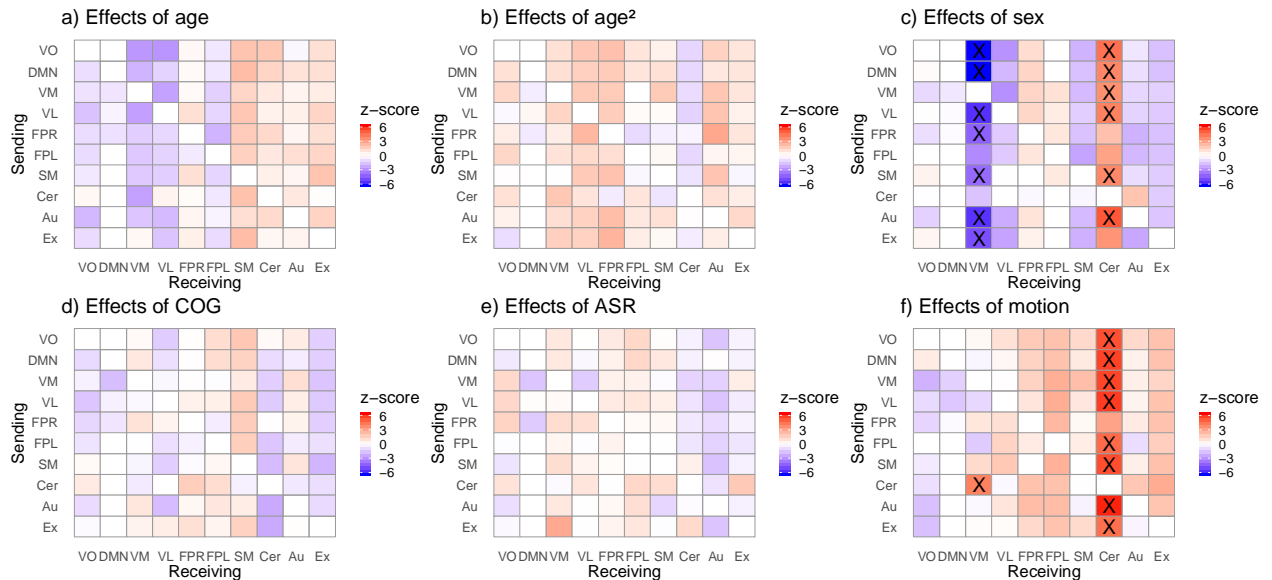

318  
 319 *Figure 3: Directed connectivity matrices showing the effects of age (a), age<sup>2</sup> (b), sex (c),*  
 320 *intellectual abilities (d), mental health (e) and motion (f) on directed connectivity. The*  
 321 *analysis was performed in all available HCP data (N=984, 22-37 years). Significant edges*  
 322 *following Bonferroni correction are marked as X. The y-axis indicates the sender node, while*  
 323 *the x-axis refers to the receiving node. The colors reflect the z-value for the corresponding*  
 324 *effects where red indicates a positive association and blue a negative association.*

325

### 326 Significant effects of sex and motion on directed connectivity

327 Analysis of edge-wise associations of dFC with age, age<sup>2</sup>, sex, intellectual abilities, mental  
 328 health and motion in the full HCP sample (N=984) yielded significant effects after Bonferroni  
 329 correction (Figure 3). The findings show that compared to women, the VM in men receives  
 330 less information in general from the other nodes (fig.3; SI tables 1a-b provides z-scores and  
 331 corresponding p-values). Furthermore, the cerebellar node in men compared to women more  
 332 often received information from the other networks, the opposite of what was found for VM.  
 333 In addition, motion had significant impact on directed connectivity between the CER-VM and  
 334 for edges involving the cerebellar network, whereas age, age<sup>2</sup>, intellectual abilities and mental  
 335 health, were not significantly associated with directed connectivity at the edge-level.

336

337 Node-level analysis reveals significant effects of age and sex on directed connectivity

338 Next, we assessed network balance. In line with results from the edge-wise analyses, we  
339 found that sex was significantly associated with node balance of the VM network ( $t = 6.59$ ,  
340  $P_{\text{Bonf}} = .038$ ), with this network having more outputs than inputs in males, rendering this node  
341 to send more information in males compared to females (Fig. 4a). In addition, there was a  
342 significant relationship between the VM node and age ( $t = 2.9$ ,  $P_{\text{Bonf}} < .001$ ), where we  
343 observed a higher balance with higher age, indicating that VM sends more information with  
344 higher age. Further, when looking at the overall balance for the FPR we found that this node  
345 sends more information to other nodes in females compared to males ( $t = -3.34$ ,  $P_{\text{Bonf}} = .009$ ;  
346 Fig.4b). Additionally, the cerebellar network revealed a significant effect of sex where the  
347 cerebellar network in females gives more information to other networks, compared to males  
348 (Fig 4c;  $t = -4.27$ ,  $P_{\text{Bonf}} < .001$ ).

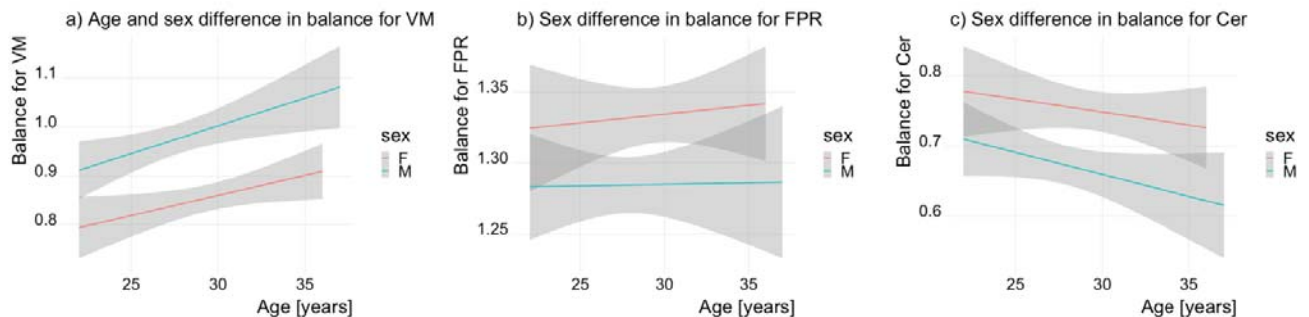

349

350 *Figure 4: Significant age and sex differences in node balance in (a) VM, (b) FPR and (c) Cer*  
351 *for HCP (N=984). The y-axis indicates the balance for the node (if it generally sends or*  
352 *receives information to the other nodes), while the x-axis shows the age span for the subjects.*

353

354 Similar investigations in older individuals revealed effects of age, sex, motion and scanner on  
355 dFC

356 Next, we employed the same analysis approach using UK Biobank data (age range: 40-70  
357 years). We partly replicated the pattern of dFC between networks as previously reported by



358 Schwab et al. (2018). Whereas the characteristic of the Au network to have many input  
 359 connections as found in HCP data did not replicate, UK Biobank data confirmed this pattern  
 360 for the cerebellum, as well as a bidirectionality of the VM-VL edge with these nodes having a  
 361 reciprocal information flow (Fig. 5).

362 Edge-wise analysis of dFC alterations related to age, sex, cognition, psychopathology,  
 363 motion and scanning site is illustrated in Figure 5 (SI tables 2a-e provides z-scores and  
 364 corresponding p-values for UK Biobank data).

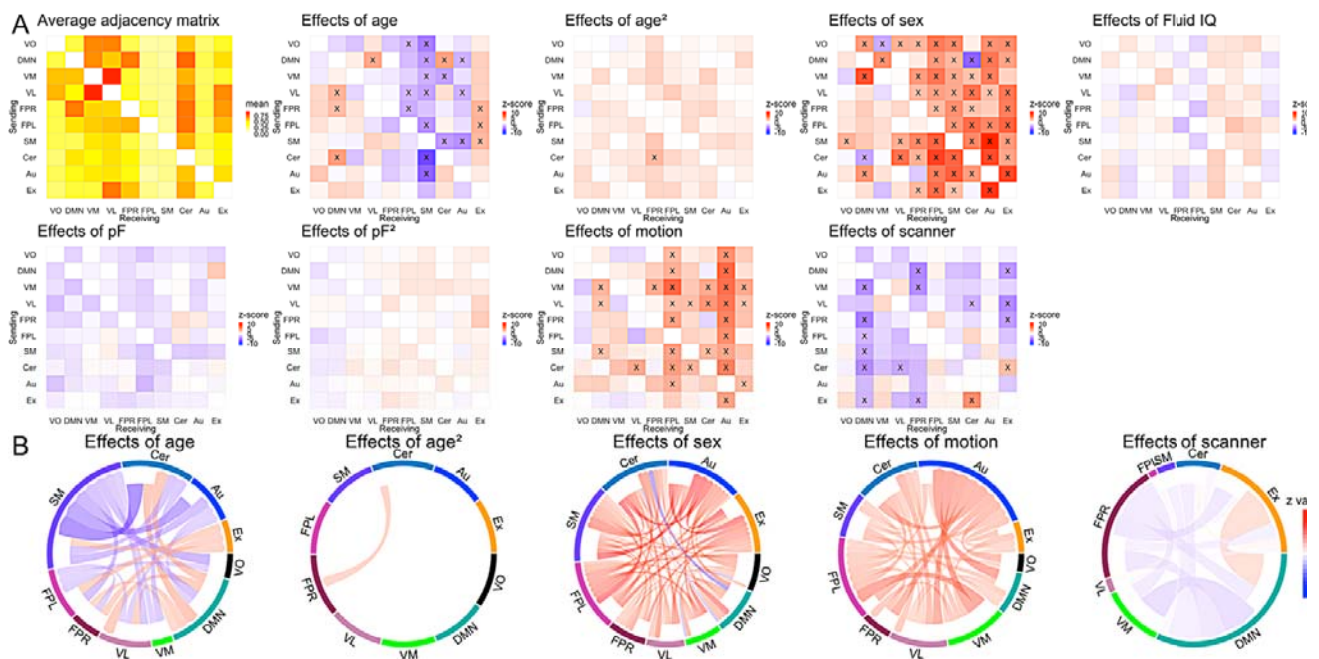

365  
 366 *Figure 5: A) Average directed connectivity matrix and corresponding effects of age, age<sup>2</sup>, sex,*  
 367 *Fluid Intelligence, pF, pF<sup>2</sup>, motion and scanner for UK Biobank (N=10,249, 40-70 years).*  
 368 *Significant edges following Bonferroni correction are marked as X. B) chord diagrams that*  
 369 *display only the significant effects of age, age<sup>2</sup>, sex, motion and scanner for the UK Biobank*  
 370 *sample. The colors of the arrows reflect the z-value for the corresponding effects where red*  
 371 *indicates a positive association and blue a negative association. The arrow heads in the*  
 372 *circular plots indicate direction (receiver or sender).*

373

374 We found a significant effect of age on edge-wise information flow with a positive  
375 association for the VL, FPR and the cerebellar network, with these nodes giving more  
376 information to the DMN with higher age. Further, with higher age the DMN gives more  
377 information to the VL and Cer network, while the Ex receives more information from the  
378 FPR, FPL and the SM (Fig.5; see SI for further details). Moreover, SM receives less  
379 information in general from the other nodes and this node sends less information input in the  
380 information flow with the cerebellar and auditory networks with higher age. In addition, VM  
381 showed a pattern of less output connections, sending less information to the cerebellar  
382 network and there was also a decrease in information flow from VO to FPL, VL-FPL and  
383 FPR-FPL, and for the DMN and VL to the auditory network. In addition, there was an effect  
384 of age<sup>2</sup>, from CER to the FPR node.

385 Also, there was widespread significant associations between dFC and sex (fig.5; see SI  
386 for further details), where the FPR, FPL, SM, CER, Au and Ex nodes in males more often  
387 receive information in general from the other nodes compared to females. The opposite was  
388 found for VO-VM, and there was bidirectional dFC between DMN and CER with reduced  
389 information flow in both directions observed in males. In addition, there was a reciprocal  
390 mutual relationship between the DMN and VM, with increased information flow in both  
391 directions with higher age. Also, the DMN received more information input from Au and VO  
392 in aging, while the SM node sent more information to the VO while the VL received more  
393 information from the VO, SM and Cer with higher age.

394

#### 395 Node-level analysis reveals significant effects of age and sex in directed connectivity

396 Further, we examined network balance in UK Biobank data. Here we found that age and sex  
397 were significantly associated with node balance of the auditory network, with this node  
398 sending more information to the other nodes in females compared to males ( $t = -5.5$ ,  $P_{\text{Bonf}}$

399 <.001; Fig.6a), and the same relationship was found for the FPL node ( $t = -3.41$ ,  $P_{\text{Bonf}} = .006$ ).  
400 In addition, there was a significant effect of age in both Au ( $t = 4.05$ ,  $P_{\text{Bonf}} < .001$ ) and FPL ( $t$   
401  $= 3.11$ ,  $P_{\text{Bonf}} = .02$ ), with these two nodes giving more information to the other nodes with  
402 higher age. Also, the Ex network showed a significant age and sex association, sending less  
403 information to the other nodes with higher age ( $t = -4.17$ ,  $P_{\text{Bonf}} < .001$ ) and in males ( $t = -6.47$ ,  
404  $P_{\text{Bonf}} < .001$ ; Fig.6c). The VO network showed the same pattern in relation to aging ( $t = -3.73$ ,  
405  $P_{\text{Bonf}} = .002$ ), but the sex effects were here the opposite of what was found for the Ex network,  
406 with the VO node showing a pattern of sending more information to the other nodes in males  
407 compared to females ( $t = 4.33$ ,  $P_{\text{Bonf}} < .001$ ; Fig.6d). Further, the SM sends more information  
408 with higher age ( $t = 7.12$ ,  $P_{\text{Bonf}} < .001$ ; fig.6e), and the VM network display significant sex  
409 effects, with the balance indicating that this node sends more information to the other nodes  
410 in males compared to females ( $t = 6.23$ ,  $P_{\text{Bonf}} < .001$ ; Fig.6g). In addition, there was a  
411 significant association between age<sup>2</sup> and balance of the FPR network ( $t = -2.95$ ,  $P_{\text{Bonf}} = .03$ ;  
412 Fig.6f).

413 Taken together, these findings indicate overall that nodes tend to send more  
414 information in females, except when it comes to the visual networks, where these networks  
415 send more information in males. We did not find any significant associations between node  
416 balance and pF or cognitive test performance.

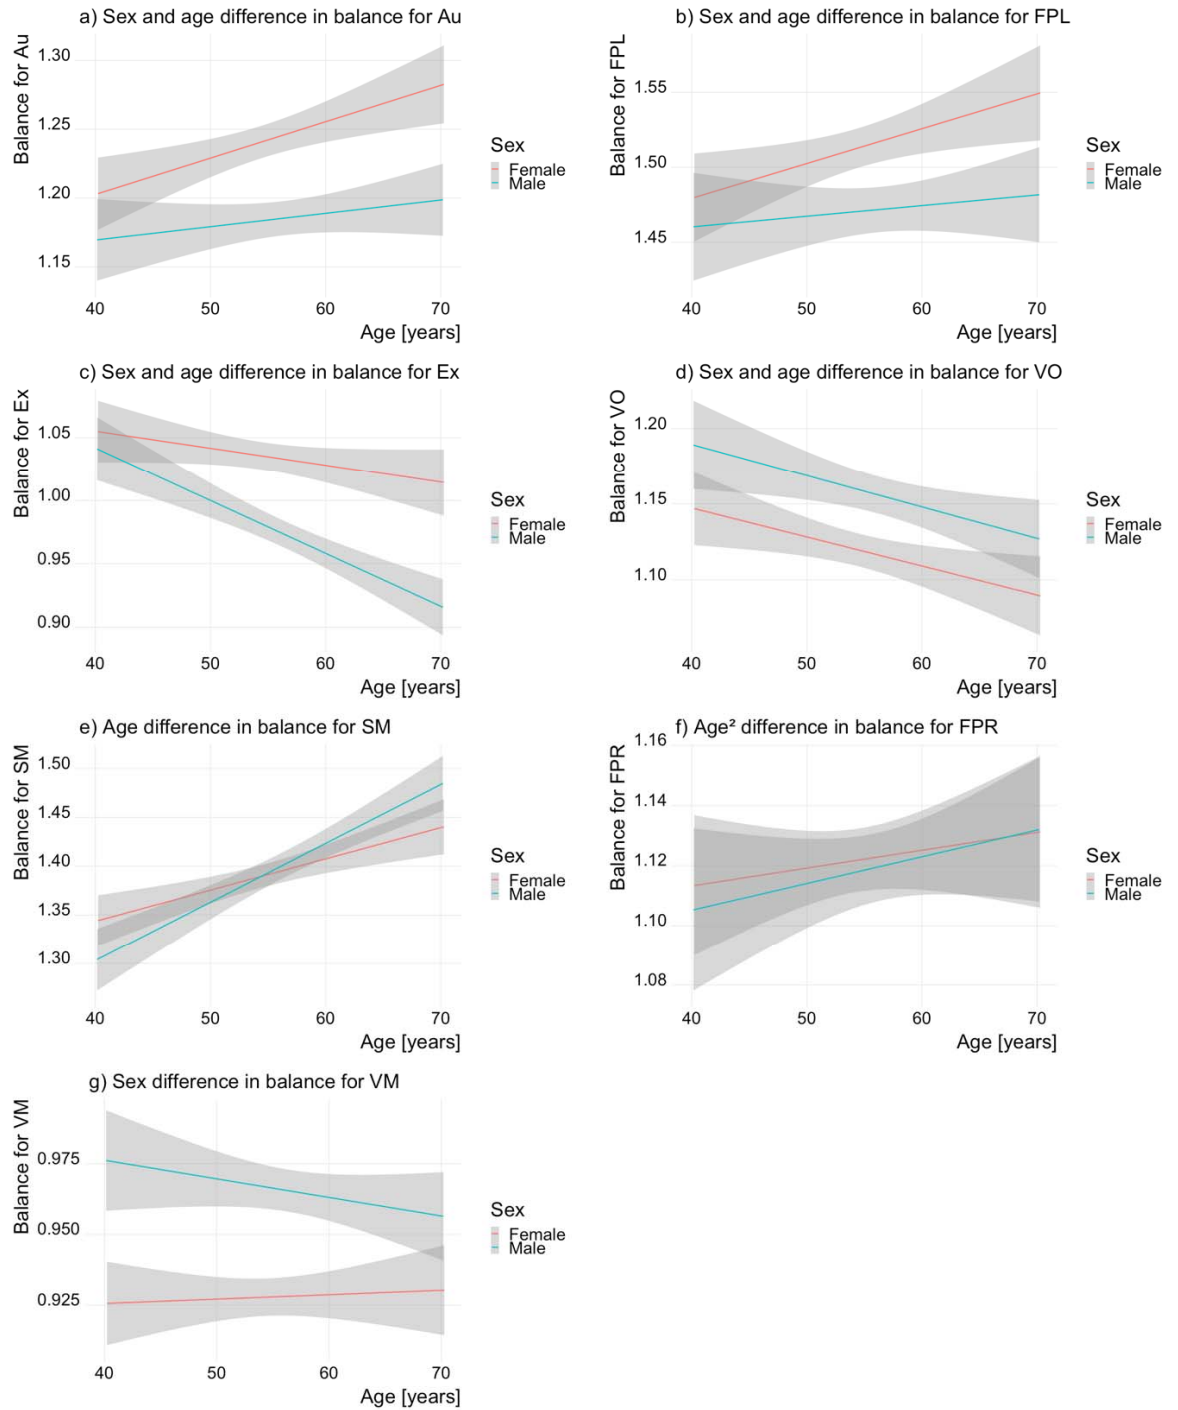

417

418 *Figure 6: (a) Significant association of node balance with age and sex effects in (a) Au, (b)*

419 *FPL, (c) Ex, and (d) VO. Significant age difference in node balance for (e) SM, significant*

420 *age<sup>2</sup> difference in node balance of (f) FPR and significant sex difference in node balance of*

421 *(g)VM.*

422

423 Discussion

424 The aim of the current study was to test for associations between dFC and age, age<sup>2</sup>, sex,  
425 cognitive abilities and mental health between core brain networks after validating the  
426 approach in the HCP data (Schwab et al. (2018)). We performed the analysis in healthy  
427 participants from two large public cohorts that differed in their age range (HCP: 22-37 years,  
428 n= 984, UK Biobank: 40-70 years, n=10,249).

429 We replicated the patterns of dFC between networks in the HCP sample as previously  
430 reported in Schwab et al. (2018). Both the HCP and UK Biobank samples confirmed that the  
431 cerebellar network receives mostly rather than emits information from several other networks.  
432 Further, the visual areas VM and VL showed a bi-directionality in the information flow of  
433 their connectivity, with effects particularly pronounced in UK Biobank. Whereas the  
434 previously reported (Schwab et al., 2018) patterns that the auditory network mostly receives  
435 information from others replicated in the independent HCP analyses in the present study,  
436 similar patterns were not observed in UK Biobank data. These differences may be attributable  
437 to sample specific differences, such as the differences in the age range or differences in the  
438 decomposition of the Au network.

439 We observed marked effects of age on dFC in UK Biobank sample. For example, the  
440 sensorimotor network generally received little information from other networks with higher  
441 age in the 40-70 years age range. This is particularly interesting given that dysconnectivity of  
442 sensorimotor networks has previously been associated with schizophrenia (Cheng et al., 2015;  
443 T. Kaufmann et al., 2015), and apparent aging of the brain appears a key characteristic in  
444 schizophrenia (Hajek et al., 2019; Tobias Kaufmann et al., 2019; Schnack et al., 2016),  
445 making it of interest to delineate how age-related effects play a part in healthy aging as well  
446 as mental disorders.

447 Overall, most age effects were in the direction of decreased reception with higher age.  
448 However, two connections showed a bi-directional relationship with age with decreased  
449 connectivity flow in both directions between these nodes (Cer-SM, Au-SM). Additionally,  
450 two connections of the DMN increased bi-directionally with age (Cer-DMN, DMN-VL). Of  
451 note, increased static connectivity between the cerebellum and the DMN with age has  
452 previously been reported in a study comparing a group of young to a group of old individuals  
453 (Dørum et al., 2017). While connectivity was lower in the young group during rest, it was  
454 higher in the young group during task load (Dørum et al., 2017), which is in line with the  
455 established decline of DMN variability in old age (Maglanoc, Kaufmann, Jonassen, et al.,  
456 2019; Mowinckel, Espeseth, & Westlye, 2012). Thus, changes in direction with age may also  
457 depend on task load, which will need to be explored in future studies. Finally, when  
458 examining dFC on the node-level, we observed in the HCP sample that the VM receives less  
459 information in early adulthood (20-40 years), and that the SM sends more information input  
460 later in life (40-70 years) in the UK Biobank sample.

461 The marked pattern of more inputs than outputs of the cerebellum, which replicated  
462 across samples, showed significant sex differences at the edge- and node-level. Males  
463 expressed this receiver pattern stronger than females. In contrast, the pattern of more inputs  
464 than outputs of the VM appeared stronger in females, as observed at the edge- and node-level  
465 in HCP data and at the node-level in UK Biobank data. There was also a pronounced effect of  
466 sex on dFC in the sensorimotor network in UK Biobank data, with males showing a more  
467 marked pattern of dFC compared to females on the edge-level. Prior research has reported  
468 increased connectivity in males in the sensorimotor network in resting-state (Scheinost et al.,  
469 2015) and both increased and decreased down regulation between males and females while  
470 participants were performing a motor task (Lissek et al., 2007). These sex effects yield insight  
471 into how sex factors into information flow of large-scale brain networks and can be of help in

472 giving a better understanding of the connectome in general and also for sex differences found  
473 in symptom onset and burden in mental disorders.

474         Whereas our results revealed distinct effects of age and sex on dFC, none of our  
475 analyses identified significant relations with individual differences in cognitive test  
476 performance or mental health. However, other studies looking at patient groups in relation to  
477 psychiatric disorders have observed alterations in connectivity direction with mental health  
478 (Lu et al., 2012; Rolls et al., 2018; Schlösser et al., 2003; Shannon et al., 2009; Wicker et al.,  
479 2008) and it should be noted that all included individuals in our study were healthy and thus  
480 the variations related to mental health was small, making it difficult to detect associations.  
481 Also, the tools taken to assess mental health may to some degree also have had an impact on  
482 the null findings. The MHQ in UK Biobank was taken a long time after the scanning and it  
483 may thus not be a solid marker of the state at the participants' time of scanning. Likewise, due  
484 to differences in available data, we used different approaches for measuring mental health,  
485 estimating two principal components in UK Biobank and utilizing a sum score in the HCP  
486 data. Also, the ASR item used to measure psychiatric and life function in HCP may not be  
487 specific enough as it represents a sum score of a range of domains extending to depression  
488 and anxiety, aggressive behavior, attentional problems and hyperactivity, personality traits,  
489 psychotic and abnormal behavior, risk taking and impulsivity, somatic complaints, and  
490 substance use.

491

#### 492 Limitations

493 There are limitations in the current study. The data was processed in different pipelines and  
494 we thus chose not to analyze the two samples together as would have been of interest for  
495 studying age effects across the lifespan. While we observed various patterns across the two  
496 independent cohorts, there were also marked differences that might be partly attributable to



497 confound effects, such as variability in the ICA decompositions, scanning site and motion. Of  
498 note, while confounders showed significant effects on dFC, they are unlikely to explain the  
499 main findings. For example, the reported pattern of the cerebellum was observed in both HCP  
500 and UK Biobank data, yet only in HCP data the cerebellum also showed motion confounds.  
501 Moreover, DGM estimates connections binary, which may have rendered the association  
502 analyses less sensitive. In addition, DGM requires high-quality fMRI data with a low TR and  
503 benefits from a high number of observations. The long scan duration needed to acquire such  
504 data may have increased the chance that participants may fall asleep while they are being  
505 scanned. This is especially a challenge for the HCP project were participants are in the MRI  
506 scanner for a long time period (Glasser et al., 2018; Liu et al., 2018). The lack of variation  
507 and low number limited the ability to investigate association with cognitive and mental health  
508 measures. Future research, involving patients with psychiatric disorders may reveal if and  
509 how information flow is associated with disorders or related to specific symptoms.

510

## 511 Conclusions

512 In conclusion, using the rsfMRI data from extended HCP as well as the UK Biobank samples  
513 we replicated several of the directed connectivity patterns from the original HCP analysis  
514 (Schwab et al., 2018). In particular we observed a marked characteristic of the cerebellar  
515 network to receive directed edges from many areas, and the visual areas VM and VL showed  
516 a bi-directionality in the information flow of their connectivity. Further, there was widespread  
517 age and sex effects on information flow, where strong age effects were observed in the  
518 sensorimotor network. Our findings support the use of DGM as a measure of directed  
519 connectivity in rsfMRI data and uncovered new insight into the shaping of the connectome in  
520 aging. Future studies should examine dFC in other samples and look at directional changes in  
521 connectivity in relation to clinical populations and in broader age ranges.



522

523 Funding

524 The authors were funded by the Research Council of Norway (276082 LifespanHealth,  
525 223273 NORMENT, 249795, SYNSCHIZ #283798) and the European Research Council  
526 (ERC StG 802998 BRAINMINT).

527

528 Acknowledgements

529 We thank Tom Nichols for advice and input on this work. This research has been conducted  
530 using the UK Biobank Resource (access code 27412, <https://www.ukbiobank.ac.uk/>) and  
531 using data provided by the Human Connectome Project, WU-Minn Consortium (Principal  
532 Investigators: David Van Essen and Kamil Ugurbil; 1U54MH091657) funded by the 16 NIH  
533 Institutes and Centers that support the NIH Blueprint for Neuroscience Research; and by the  
534 McDonnell Center for Systems Neuroscience at Washington University.

535

536

537 References

538

- 539 Alfaro-Almagro, F., Jenkinson, M., Bangerter, N. K., Andersson, J. L. R., Griffanti, L., Douaud,  
540 G., . . . Smith, S. M. (2018). Image processing and Quality Control for the first 10,000  
541 brain imaging datasets from UK Biobank. *NeuroImage*, *166*, 400-424.  
542 doi:10.1016/j.neuroimage.2017.10.034
- 543 Ardila, A. (2007). Normal aging increases cognitive heterogeneity: analysis of dispersion in  
544 WAIS-III scores across age. *Arch Clin Neuropsychol*, *22*(8), 1003-1011.  
545 doi:10.1016/j.acn.2007.08.004
- 546 Beckmann, C. F., & Smith, S. M. (2004). Probabilistic Independent Component Analysis for  
547 Functional Magnetic Resonance Imaging. *IEEE Transactions on Medical Imaging*,  
548 *23*(2), 137-152. doi:10.1109/tmi.2003.822821
- 549 Betzel, R. F., Byrge, L., He, Y., Goni, J., Zuo, X. N., & Sporns, O. (2014). Changes in structural  
550 and functional connectivity among resting-state networks across the human lifespan.  
551 *NeuroImage*, *102 Pt 2*, 345-357. doi:10.1016/j.neuroimage.2014.07.067
- 552 Bielschky, N. Z., Uithol, S., van Mourik, T., Anderson, P., Glennon, J. C., & Buitelaar, J. K.  
553 (2019). Disentangling causal webs in the brain using functional magnetic resonance  
554 imaging: A review of current approaches. *Netw Neurosci*, *3*(2), 237-273.  
555 doi:10.1162/netn\_a\_00062
- 556 Bilmes, J. (2010). Dynamic Graphical Models. *IEEE Signal Processing Magazine*.  
557 doi:10.1109/msp.2010.938078
- 558 Caspi, A., Houts, R. M., Belsky, D. W., Goldman-Mellor, S. J., Harrington, H., Israel, S., . . .  
559 Moffitt, T. E. (2013). The p Factor. *Clinical Psychological Science*, *2*(2), 119-137.  
560 doi:10.1177/2167702613497473
- 561 Cassady, K., Gagnon, H., Lalwani, P., Simmonite, M., Foerster, B., Park, D., . . . Polk, T. A.  
562 (2019). Sensorimotor network segregation declines with age and is linked to GABA  
563 and to sensorimotor performance. *NeuroImage*, *186*, 234-244.  
564 doi:10.1016/j.neuroimage.2018.11.008
- 565 Cheng, W., Palaniyappan, L., Li, M., Kendrick, K. M., Zhang, J., Luo, Q., . . . Feng, J. (2015).  
566 Voxel-based, brain-wide association study of aberrant functional connectivity in  
567 schizophrenia implicates thalamocortical circuitry. *npj Schizophrenia*, *1*(1).  
568 doi:10.1038/npjSchz.2015.16
- 569 Collins, R. (2012). What makes UK Biobank special? *The Lancet*, *379*(9822), 1173-1174.  
570 doi:10.1016/s0140-6736(12)60404-8
- 571 Dørum, E. S., Kaufmann, T., Alnaes, D., Andreassen, O. A., Richard, G., Kolskar, K. K., . . .  
572 Westlye, L. T. (2017). Increased sensitivity to age-related differences in brain  
573 functional connectivity during continuous multiple object tracking compared to  
574 resting-state. *NeuroImage*, *148*, 364-372. doi:10.1016/j.neuroimage.2017.01.048
- 575 Filippini, N., MacIntosh, B. J., Hough, M. G., Goodwin, G. M., Frisoni, G. B., Smith, S. M., . . .  
576 Mackay, C. E. (2009). Distinct patterns of brain activity in young carriers of the APOE-  
577 4 allele. *Proceedings of the National Academy of Sciences*, *106*(17), 7209-7214.  
578 doi:10.1073/pnas.0811879106
- 579 Friston, K., Moran, R., & Seth, A. K. (2013). Analysing connectivity with Granger causality and  
580 dynamic causal modelling. *Curr Opin Neurobiol*, *23*(2), 172-178.  
581 doi:10.1016/j.conb.2012.11.010
- 582 Friston, K. J. (2011). Functional and Effective Connectivity: A Review. *Brain Connectivity*, *1*(1),  
583 13-36. doi:10.1089/brain.2011.0008

- 584 Geerligs, L., Renken, R. J., Saliassi, E., Maurits, N. M., & Lorist, M. M. (2015). A Brain-Wide  
585 Study of Age-Related Changes in Functional Connectivity. *Cereb Cortex*, *25*(7), 1987-  
586 1999. doi:10.1093/cercor/bhu012
- 587 Glasser, M. F., Coalson, T. S., Bijsterbosch, J. D., Harrison, S. J., Harms, M. P., Anticevic, A., . . .  
588 Smith, S. M. (2018). Using temporal ICA to selectively remove global noise while  
589 preserving global signal in functional MRI data. *NeuroImage*, *181*, 692-717.  
590 doi:10.1016/j.neuroimage.2018.04.076
- 591 Glasser, M. F., Smith, S. M., Marcus, D. S., Andersson, J. L. R., Auerbach, E. J., Behrens, T. E.  
592 J., . . . Van Essen, D. C. (2016). The Human Connectome Project's neuroimaging  
593 approach. *Nature Neuroscience*, *19*(9), 1175-1187. doi:10.1038/nn.4361
- 594 Glasser, M. F., Sotiropoulos, S. N., Wilson, J. A., Coalson, T. S., Fischl, B., Andersson, J. L., . . .  
595 Consortium, W. U.-M. H. (2013). The minimal preprocessing pipelines for the Human  
596 Connectome Project. *NeuroImage*, *80*, 105-124.  
597 doi:10.1016/j.neuroimage.2013.04.127
- 598 Glover, G. H., Mueller, B. A., Turner, J. A., van Erp, T. G. M., Liu, T. T., Greve, D. N., . . . Potkin,  
599 S. G. (2012). Function biomedical informatics research network recommendations for  
600 prospective multicenter functional MRI studies. *Journal of Magnetic Resonance*  
601 *Imaging*, *36*(1), 39-54. doi:10.1002/jmri.23572
- 602 Grady, C. L., Springer, M. V., Hongwanishkul, D., McIntosh, A. R., & Winocur, G. (2006). Age-  
603 related changes in brain activity across the adult lifespan. *Journal of cognitive*  
604 *neuroscience*, *18*(2), 227-241.
- 605 Greve, D. N., & Fischl, B. (2009). Accurate and robust brain image alignment using boundary-  
606 based registration. *NeuroImage*, *48*(1), 63-72. doi:10.1016/j.neuroimage.2009.06.060
- 607 Griffanti, L., Salimi-Khorshidi, G., Beckmann, C. F., Auerbach, E. J., Douaud, G., Sexton, C. E., .  
608 . . . Smith, S. M. (2014). ICA-based artefact removal and accelerated fMRI acquisition  
609 for improved resting state network imaging. *NeuroImage*, *95*, 232-247.  
610 doi:10.1016/j.neuroimage.2014.03.034
- 611 Hajek, T., Franke, K., Kolenic, M., Capkova, J., Matejka, M., Propper, L., . . . Alda, M. (2019).  
612 Brain Age in Early Stages of Bipolar Disorders or Schizophrenia. *Schizophr Bull*, *45*(1),  
613 190-198. doi:10.1093/schbul/sbx172
- 614 Health Research Authority. (2016). Retrieved from [http://www.ukbiobank.ac.uk/wp-](http://www.ukbiobank.ac.uk/wp-content/uploads/2018/05/Favourable-Ethical-Opinion-and-RTB-Approval-16.NW.0274-200778-May-2016.pdf)  
615 [content/uploads/2018/05/Favourable-Ethical-Opinion-and-RTB-Approval-](http://www.ukbiobank.ac.uk/wp-content/uploads/2018/05/Favourable-Ethical-Opinion-and-RTB-Approval-16.NW.0274-200778-May-2016.pdf)  
616 [16.NW.0274-200778-May-2016.pdf](http://www.ukbiobank.ac.uk/wp-content/uploads/2018/05/Favourable-Ethical-Opinion-and-RTB-Approval-16.NW.0274-200778-May-2016.pdf).
- 617 Huo, C., Zhang, M., Bu, L., Xu, G., Liu, Y., Li, Z., & Sun, L. (2018). Effective Connectivity in  
618 Response to Posture Changes in Elderly Subjects as Assessed Using Functional Near-  
619 Infrared Spectroscopy. *Frontiers in Human Neuroscience*, *12*.  
620 doi:10.3389/fnhum.2018.00098
- 621 Hutchison, R. M., Womelsdorf, T., E.A., A., Bandettini, P. A., Calhoun, V. D., Corbetta, M., . . .  
622 Chang, C. (2013). Dynamic functional connectivity: Promise, issues, and  
623 interpretations. *NeuroImage*, *15*(80). doi:10.1016/j.neuroimage.2013.05.079
- 624 Hyvärinen, A. (1999). Fast and robust fixed-point algorithms for independent component  
625 analysis. *IEEE*  
626 *Transactions on Neural Networks*, *10*(3), 626-634.
- 627 Jenkinson, M., Bannister, P., Brady, M., & Smith, S. (2002). Improved Optimization for the  
628 Robust and Accurate Linear Registration and Motion Correction of Brain Images.  
629 *NeuroImage*, *17*(2), 825-841. doi:10.1006/nimg.2002.1132

- 630 Jenkinson, M., & Smith, S. (2001). A global optimisation method for robust affine registration  
631 of brain images. *Medical image analysis*, 5(2), 143-156.
- 632 Josse, J., & Husson, F. (2016). missMDA: A Package for Handling Missing Values in  
633 Multivariate Data Analysis. *Journal of Statistical Software*, 70(1).  
634 doi:10.18637/jss.v070.i01
- 635 Kaufmann, T., Skatun, K. C., Alnaes, D., Doan, N. T., Duff, E. P., Tonnesen, S., . . . Westlye, L. T.  
636 (2015). Disintegration of Sensorimotor Brain Networks in Schizophrenia. *Schizophr*  
637 *Bull*, 41(6), 1326-1335. doi:10.1093/schbul/sbv060
- 638 Kaufmann, T., van der Meer, D., Doan, N. T., Schwarz, E., Lund, M. J., Agartz, I., . . . Westlye,  
639 L. T. (2019). Common brain disorders are associated with heritable patterns of  
640 apparent aging of the brain. *Nature Neuroscience*, 22(10), 1617-1623.  
641 doi:10.1038/s41593-019-0471-7
- 642 Lissek, S., Hausmann, M., Knossalla, F., Peters, S., Nicolas, V., Güntürkün, O., & Tegenthoff,  
643 M. (2007). Sex differences in cortical and subcortical recruitment during simple and  
644 complex motor control: An fMRI study. *NeuroImage*, 37(3), 912-926.  
645 doi:10.1016/j.neuroimage.2007.05.037
- 646 Liu, X., de Zwart, J. A., Scholvinck, M. L., Chang, C., Ye, F. Q., Leopold, D. A., & Duyn, J. H.  
647 (2018). Subcortical evidence for a contribution of arousal to fMRI studies of brain  
648 activity. *Nat Commun*, 9(1), 395. doi:10.1038/s41467-017-02815-3
- 649 Lu, Q., Li, H., Luo, G., Wang, Y., Tang, H., Han, L., & Yao, Z. (2012). Impaired prefrontal-  
650 amygdala effective connectivity is responsible for the dysfunction of emotion process  
651 in major depressive disorder: a dynamic causal modeling study on MEG. *Neurosci*  
652 *Lett*, 523(2), 125-130. doi:10.1016/j.neulet.2012.06.058
- 653 Luo, X., Li, K., Jia, Y. L., Zeng, Q., Jiaerken, Y., Qiu, T., . . . Alzheimer's Disease Neuroimaging, I.  
654 (2019). Altered effective connectivity anchored in the posterior cingulate cortex and  
655 the medial prefrontal cortex in cognitively intact elderly APOE epsilon4 carriers: a  
656 preliminary study. *Brain Imaging Behav*, 13(1), 270-282. doi:10.1007/s11682-018-  
657 9857-5
- 658 Maglanoc, L. A., Kaufmann, T., Jonassen, R., Hilland, E., Beck, D., Landrø, N. I., & Westlye, L.  
659 T. (2019). Multimodal fusion of structural and functional brain imaging in depression  
660 using linked independent component analysis. *Human Brain Mapping*.  
661 doi:10.1002/hbm.24802
- 662 Maglanoc, L. A., Kaufmann, T., van der Meer, D., Marquand, A. F., Wolfers, T., Jonassen, R., .  
663 . . Westlye, L. T. (2019). Predicting cognitive and mental health traits and their  
664 polygenic architecture using large-scale brain connectomics. *bioRxiv*.  
665 doi:10.1101/609586
- 666 Mallard, T. T., Linnér, R. K., Okbay, A., Grotzinger, A. D., de Vlaming, R., Meddens, S. F. W., . .  
667 . Harden, K. P. (2019). Not just one p: Multivariate GWAS of psychiatric disorders and  
668 their cardinal symptoms reveal two dimensions of cross-cutting genetic liabilities. .  
669 *bioRxiv*, 603134. doi:10.1101/603134
- 670 Marcus, D. S., Harms, M. P., Snyder, A. Z., Jenkinson, M., Wilson, J. A., Glasser, M. F., . . . Van  
671 Essen, D. C. (2013). Human Connectome Project informatics: Quality control,  
672 database services, and data visualization. *NeuroImage*, 80, 202-219.  
673 doi:10.1016/j.neuroimage.2013.05.077
- 674 McKeown, M. J., Makeig, S., Brown, G. G., Jung, T. P., Kindermann, S. S., Bell, A. J., &  
675 Sejnowski, T. J. (1998). Analysis of fMRI Data by Blind Separation Into Independent  
676 Spatial Components. *Human Brain Mapping*, 6(3), 160-188.

- 677 McKeown, M. J., & Sejnowski, T. J. (1998). Independent component analysis of fMRI data:  
678 examining the assumptions. *Human Brain Mapping*, 6(5-6), 368-372.
- 679 Meunier, D., Achard, S., Morcom, A., & Bullmore, E. (2009). Age-related changes in modular  
680 organization of human brain functional networks. *NeuroImage*, 44(3), 715-723.  
681 doi:10.1016/j.neuroimage.2008.09.062
- 682 Michely, J., Volz, L. J., Hoffstaedter, F., Tittgemeyer, M., Eickhoff, S. B., Fink, G. R., & Grefkes,  
683 C. (2018). Network connectivity of motor control in the ageing brain. *NeuroImage:  
684 Clinical*, 18, 443-455. doi:10.1016/j.nicl.2018.02.001
- 685 Miller, K. L., Alfaro-Almagro, F., Bangerter, N. K., Thomas, D. L., Yacoub, E., Xu, J., . . . Smith,  
686 S. M. (2016). Multimodal population brain imaging in the UK Biobank prospective  
687 epidemiological study. *Nature Neuroscience*, 19(11), 1523-1536.  
688 doi:10.1038/nn.4393
- 689 Mowinckel, A. M., Espeseth, T., & Westlye, L. T. (2012). Network-specific effects of age and  
690 in-scanner subject motion: a resting-state fMRI study of 238 healthy adults.  
691 *NeuroImage*, 63(3), 1364-1373. doi:10.1016/j.neuroimage.2012.08.004
- 692 Pehrs, C., Zaki, J., Taruffi, L., Kuchinke, L., & Koelsch, S. (2018). Hippocampal-Temporopolar  
693 Connectivity Contributes to Episodic Simulation During Social Cognition. *Sci Rep*, 8(1),  
694 9409. doi:10.1038/s41598-018-24557-y
- 695 Preller, K. H., Razi, A., Zeidman, P., Stämpfli, P., Friston, K. J., & Vollenweider, F. X. (2019).  
696 Effective connectivity changes in LSD-induced altered states of consciousness in  
697 humans. *Proceedings of the National Academy of Sciences*, 116(7), 2743-2748.  
698 doi:10.1073/pnas.1815129116
- 699 Riddle, D. R. (2007). *Brain aging: models, methods, and mechanisms*. : CRC Press.
- 700 Riley, J. D., Chen, E. E., Winsell, J., Davis, E. P., Glynn, L. M., Baram, T. Z., . . . Solodkin, A.  
701 (2018). Network specialization during adolescence: Hippocampal effective  
702 connectivity in boys and girls. *NeuroImage*, 175, 402-412.  
703 doi:10.1016/j.neuroimage.2018.04.013
- 704 Robinson, E. C., Jbabdi, S., Glasser, M. F., Andersson, J., Burgess, G. C., Harms, M. P., . . .  
705 Jenkinson, M. (2014). MSM: a new flexible framework for Multimodal Surface  
706 Matching. *NeuroImage*, 100, 414-426. doi:10.1016/j.neuroimage.2014.05.069
- 707 Rolls, E. T., Cheng, W., Gilson, M., Qiu, J., Hu, Z., Ruan, H., . . . Feng, J. (2018). Effective  
708 Connectivity in Depression. *Biol Psychiatry Cogn Neurosci Neuroimaging*, 3(2), 187-  
709 197. doi:10.1016/j.bpsc.2017.10.004
- 710 Salimi-Khorshidi, G., Douaud, G., Beckmann, C. F., Glasser, M. F., Griffanti, L., & Smith, S. M.  
711 (2014). Automatic denoising of functional MRI data: combining independent  
712 component analysis and hierarchical fusion of classifiers. *NeuroImage*, 90, 449-468.  
713 doi:10.1016/j.neuroimage.2013.11.046
- 714 Sankey, S. S., Weissfeld, L. A., Fine, M. J., & Kapoor, W. (1996). An assessment of the use of  
715 the continuity correction for sparse data in meta-analysis. . *Communications in  
716 Statistics-Simulation and Computation*, 25(4), 1031-1056.
- 717 Scheinost, D., Finn, E. S., Tokoglu, F., Shen, X., Papademetris, X., Hampson, M., & Constable,  
718 R. T. (2015). Sex differences in normal age trajectories of functional brain networks.  
719 *Human Brain Mapping*, 36(4), 1524-1535. doi:10.1002/hbm.22720
- 720 Schlösser, R., Gesierich, T., Kaufmann, B., Vucurevic, G., Hunsche, S., Gawehn, J., & Stoeter,  
721 P. (2003). Altered effective connectivity during working memory performance in  
722 schizophrenia: a study with fMRI and structural equation modeling. *NeuroImage*,  
723 19(3), 751-763. doi:10.1016/s1053-8119(03)00106-x

- 724 Schnack, H. G., van Haren, N. E. M., Nieuwenhuis, M., Hulshoff Pol, H. E., Cahn, W., & Kahn,  
725 R. S. (2016). Accelerated Brain Aging in Schizophrenia: A Longitudinal Pattern  
726 Recognition Study. *American Journal of Psychiatry*, *173*(6), 607-616.  
727 doi:10.1176/appi.ajp.2015.15070922
- 728 Schwab, S., Harbord, R., Zerbi, V., Elliott, L., Afyouni, S., Smith, J. Q., . . . Nichols, T. E. (2018).  
729 Directed functional connectivity using dynamic graphical models. *NeuroImage*, *175*,  
730 340-353. doi:10.1016/j.neuroimage.2018.03.074
- 731 Shannon, K. E., Sauder, C., Beauchaine, T. P., & Gatzke-Kopp, L. M. (2009). Disrupted  
732 Effective Connectivity Between the Medial Frontal Cortex and the Caudate in  
733 Adolescent Boys With Externalizing Behavior Disorders. *Criminal Justice and*  
734 *Behavior*, *36*(11), 1141-1157. doi:10.1177/0093854809342856
- 735 Smith, S. M., Beckmann, C. F., Andersson, J., Auerbach, E. J., Bijsterbosch, J., Douaud, G., . . .  
736 Consortium, W. U.-M. H. (2013). Resting-state fMRI in the Human Connectome  
737 Project. *NeuroImage*, *80*, 144-168. doi:10.1016/j.neuroimage.2013.05.039
- 738 Smith, S. M., Fox, P. T., Miller, K. L., Glahn, D. C., Fox, P. M., Mackay, C. E., . . . Beckmann, C.  
739 F. (2009). Correspondence of the brain's functional architecture during activation and  
740 rest. *Proc Natl Acad Sci U S A*, *106*(31), 13040-13045. doi:10.1073/pnas.0905267106
- 741 Sudlow, C., Gallacher, J., Allen, N., Beral, V., Burton, P., Danesh, J., . . . Collins, R. (2015). UK  
742 biobank: an open access resource for identifying the causes of a wide range of  
743 complex diseases of middle and old age. *PLoS Med*, *12*(3), e1001779.  
744 doi:10.1371/journal.pmed.1001779
- 745 Van Essen, D. C., Smith, S. M., Barch, D. M., Behrens, T. E. J., Yacoub, E., & Ugurbil, K. (2013).  
746 The WU-Minn Human Connectome Project: An overview. *NeuroImage*, *80*, 62-79.  
747 doi:10.1016/j.neuroimage.2013.05.041
- 748 Wang, L., Su, L., Shen, H., & Hu, D. (2012). Decoding lifespan changes of the human brain  
749 using resting-state functional connectivity MRI. *PLoS One*, *7*(8), e44530.  
750 doi:10.1371/journal.pone.0044530
- 751 Wicker, B., Fonlupt, P., Hubert, B., Tardif, C., Gepner, B., & Deruelle, C. (2008). Abnormal  
752 cerebral effective connectivity during explicit emotional processing in adults with  
753 autism spectrum disorder. *Soc Cogn Affect Neurosci*, *3*(2), 135-143.  
754 doi:10.1093/scan/nsn007  
755  
756  
757  
758
